# Supplementary material for: Cause-specific mortality in Spain during the pandemic: educational differences and its impact on life expectancy
Source: PubMed Central journal article supplement — Eur J Public Health. 2023 Mar 21;33(3):543–9. doi: 10.1093/eurpub/ckad036 (PMC10234659; doi:10.1093/eurpub/ckad036), 2023-03-21
Supplement: ckad036_supplementary_data.pdf [file ckad036_supplementary_data.pdf]

## **Supplementary material to the article:**

*Cause-specific mortality in Spain during the pandemic: educational differences and its impact on life expectancy*

### **Name of authors**

### **Content**

Supplementary Figure S1. Distribution of the Spanish population aged 30+ according to five-year age group, sex and educational attainment (January 2020)

Supplementary Table S1. List of causes of death used in the analysis and the corresponding ICD-10 codes

Supplementary Table S2. COVID-19 deaths as underlying cause of death (UCOD) with flu and pneumonia as contributing deaths (total deaths and as a percentage) in 2020 in Spain.

Supplementary Table S3. Distribution of causes of death registered in 2020 in Spain compared to 2018/19: underlying cause of death (UCOD) and multiple causes of death (MCOD) according to different periods of the year.

Supplementary Table S4 Contribution of COVID-19 only as underlying cause of death to all-cause life expectancy and lifespan inequality at age 30 by sex. Spain. 2020.

Supplementary references

**Supplementary Figure S1. Distribution of the Spanish population aged 30+ according to five-year age group, sex and educational attainment (January 2020)**

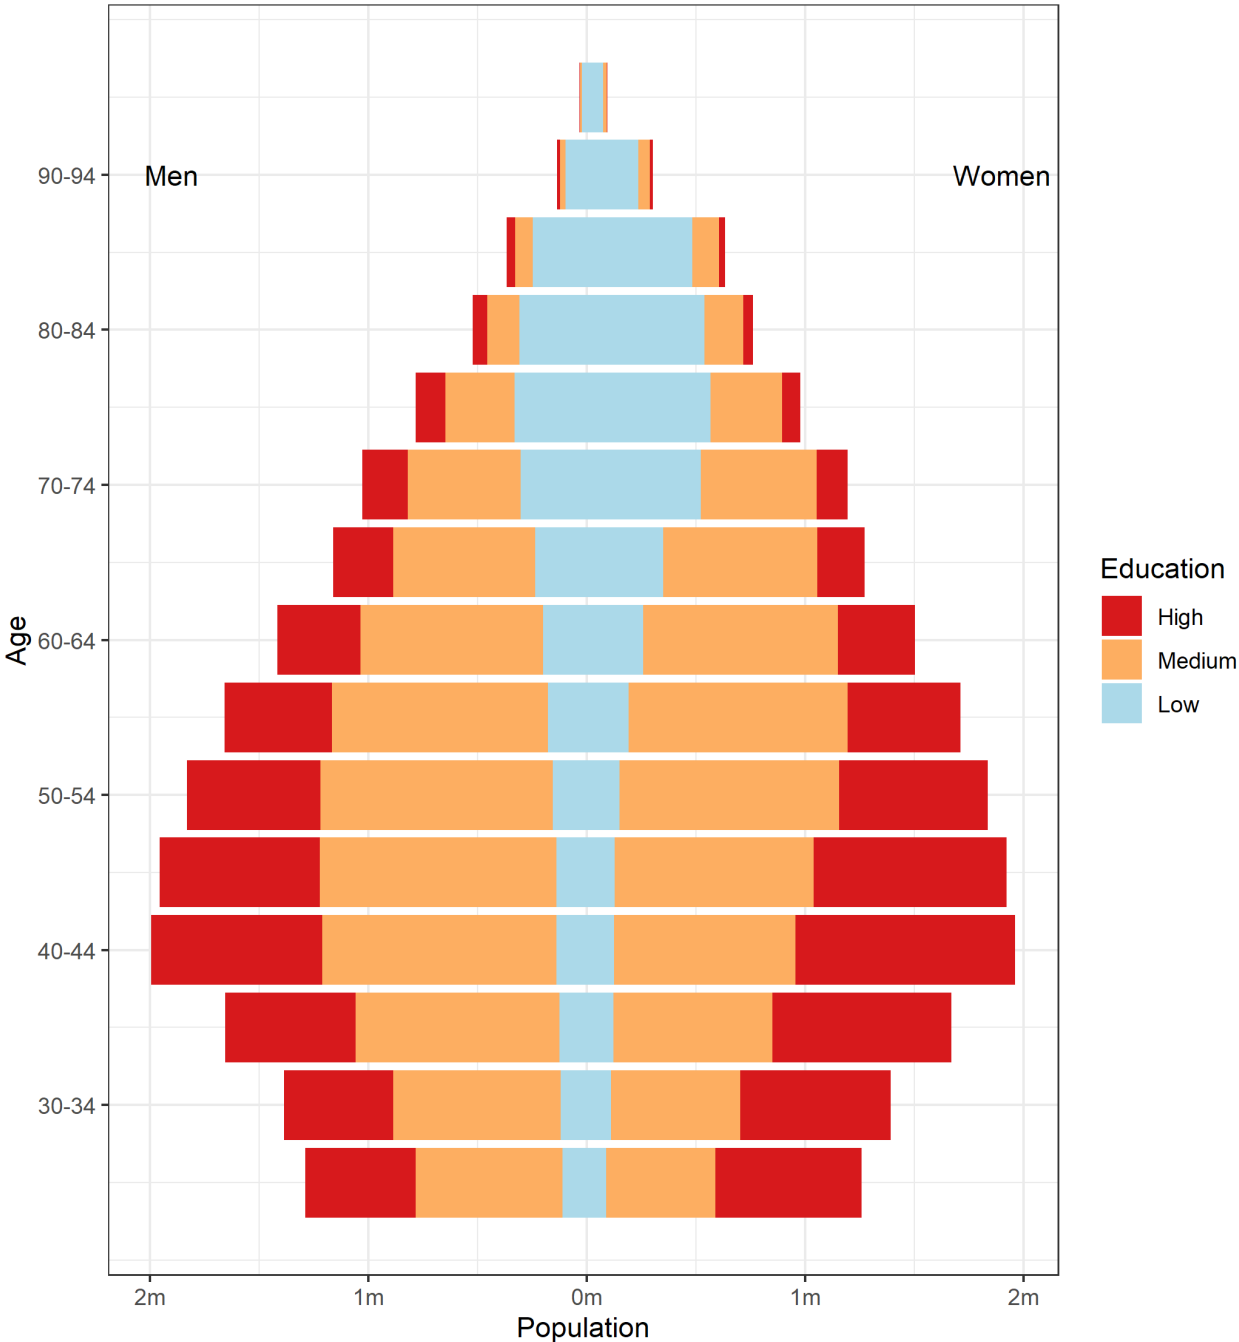

See main text for the data source and the definition of the educational attainment categories

**Supplementary Table S1. List of causes of death used in the analysis and the corresponding ICD-10 codes**

|    | Cause of death                                                  | ICD-10 codes                                         |
|----|-----------------------------------------------------------------|------------------------------------------------------|
|    | <b>All deaths</b>                                               | A00-Y98                                              |
| 1  | COVID-19                                                        | U07.1, U07.2                                         |
| 2  | Flu, Pneumonia                                                  | J10-J18                                              |
| 3  | Chronic lower respiratory diseases                              | J40-J46                                              |
| 4  | Remaining respiratory system diseases                           | J00-J09; J20-J39; J60-J70; J80-J84; J90-J95; J97-J99 |
| 5  | Sepsis                                                          | A40-A41                                              |
| 6  | Remaining infectious and parasitic diseases                     | A00-A39; A42-B99                                     |
| 7  | Malignant neoplasm of lymphoid, haematopoietic & related tissue | C81-C96                                              |
| 8  | Lung cancer                                                     | C32-C34                                              |
| 9  | Neoplasms of reproductive organs                                | Women: C50, C53-C56; Men C61                         |
| 10 | Remaining Neoplasms                                             | C00-D48                                              |
| 11 | Diseases of the blood (-forming organs), immunol disorders      | D50-D89                                              |
| 12 | Diabetes mellitus                                               | E10-E14                                              |
| 13 | Obesity                                                         | E65-E68                                              |
| 14 | Other endocrine, nutritional and metabolic diseases             | E00-E07; E15-E64; E70-E90                            |
| 15 | Dementia, Alzheimer                                             | F01-F03; G30-G31                                     |
| 16 | Other mental/behavioural disorders & Diseases of nervous system | F04-G26; G32-G99                                     |
| 17 | Hypertensive diseases                                           | I10-I15                                              |
| 18 | Ischaemic heart diseases                                        | I20-I25                                              |
| 19 | Other heart diseases                                            | I00-I09; I30-I33; I39-I45, I47-I48, I49.1-I52        |
| 20 | Cerebrovascular diseases                                        | I60-I69                                              |
| 21 | Other diseases of the circulatory system                        | I70-I95.8; I96-I98                                   |
| 22 | Chronic liver diseases                                          | K70; K73-K74                                         |
| 23 | Other diseases of the digestive system                          | K00-K67; K75-K93                                     |
| 24 | Diseases of the skin and subcutaneous tissue                    | L00-L99                                              |
| 25 | Diseases of the musculoskeletal system/connective tissue        | M00-M99                                              |
| 26 | Diseases of the genitourinary system                            | N00-N99                                              |
| 27 | Other diseases                                                  | H00-H95; O00-P28.4; P28.8-Q99; R95                   |
| 28 | Ill-defined causes                                              | I46; I49.0; I95.9; I99; J96; P28.5; R00-R94; R96-R99 |
| 29 | Transport accidents                                             | V01-V99                                              |
| 30 | Accidental falls                                                | W00-W19                                              |
| 31 | Other accidental threats to breathing                           | W75-W84                                              |
| 32 | Suicide and self-inflicted injury                               | X60-X84                                              |
| 33 | Other external causes                                           | S00-T98, W20-W74; W85-X59; X85-Y98                   |

**Supplementary Table S2. COVID-19 deaths as underlying cause of death (UCOD) with flu and pneumonia as contributing deaths (total deaths and as a percentage) in 2020 in Spain.**

|                            | Jan-<br>Feb | March-<br>May | June-<br>August | Sept-<br>Dec | <b>Total<br/>2020</b> |
|----------------------------|-------------|---------------|-----------------|--------------|-----------------------|
| COVID-19 as UCOD           | 0           | 45988         | 2726            | 26125        | <b>74839</b>          |
| Flu/Pneumonia contributing | 0           | 13640         | 843             | 8250         | <b>22733</b>          |
| % Flu/Pneumonia mentioned  | N/A         | 29.7%         | 30.9%           | 31.6%        | <b>30.4%</b>          |

For the data source, see main text.

**Supplementary Table S3. Distribution of causes of death registered in 2020 in Spain compared to 2018/19: underlying cause of death (UCOD) and multiple causes of death (MCOD) according to different periods of the year.**

| Cause of death                                              | January-February |                            |        |                            | March-May |                            |        |                            | June-August |                            |        |                            | September-December |                            |        |                            |
|-------------------------------------------------------------|------------------|----------------------------|--------|----------------------------|-----------|----------------------------|--------|----------------------------|-------------|----------------------------|--------|----------------------------|--------------------|----------------------------|--------|----------------------------|
|                                                             | UCOD             |                            | MCOD   |                            | UCOD      |                            | MCOD   |                            | UCOD        |                            | MCOD   |                            | UCOD               |                            | MCOD   |                            |
|                                                             | N 2020           | $\Delta 2020$ vs 2018/19 % | N 2020 | $\Delta 2020$ vs 2018/19 % | N 2020    | $\Delta 2020$ vs 2018/19 % | N 2020 | $\Delta 2020$ vs 2018/19 % | N 2020      | $\Delta 2020$ vs 2018/19 % | N 2020 | $\Delta 2020$ vs 2018/19 % | N 2020             | $\Delta 2020$ vs 2018/19 % | N 2020 | $\Delta 2020$ vs 2018/19 % |
| <b>All deaths</b>                                           | 79716            | -6.2                       | -      | -                          | 154302    | 44.7                       | -      | -                          | 101561      | 4.5                        | -      | -                          | 158197             | 17.8                       | -      | -                          |
| 1 COVID-19                                                  | 0                | NA                         | 4      | NA                         | 45988     | NA                         | 50258  | -                          | 2726        | NA                         | 3795   | -                          | 26125              | NA                         | 29057  | -                          |
| 2 Flu, Pneumonia                                            | 3050             | -25.3                      | 6825   | -23.0                      | 2790      | -6.8                       | 20997  | 172.9                      | 1612        | -6.6                       | 5827   | 7.6                        | 2210               | -19.7                      | 15240  | 89.9                       |
| 3 Chronic lower respiratory diseases                        | 2915             | -16.9                      | 5049   | -15.9                      | 3614      | -1.8                       | 8850   | 33.0                       | 2417        | -12.0                      | 5070   | -3.5                       | 3405               | -11.8                      | 8119   | 10.9                       |
| 4 Remaining respiratory system diseases                     | 4872             | -20.9                      | 16274  | -14.1                      | 5239      | -14.9                      | 27507  | 36.2                       | 3799        | -17.7                      | 15113  | -6.7                       | 4927               | -27.5                      | 23341  | 0.0                        |
| 5 Sepsis                                                    | 533              | -8.5                       | 2458   | -5.6                       | 617       | -13.6                      | 4037   | 22.1                       | 718         | -2.4                       | 3582   | 5.1                        | 877                | -5.7                       | 4510   | 2.3                        |
| 6 Remaining infectious and parasitic diseases               | 671              | -1.4                       | 2095   | -3.3                       | 885       | 5.0                        | 4944   | 79.2                       | 709         | -4.3                       | 2754   | 11.2                       | 946                | -8.3                       | 5124   | 51.0                       |
| 7 Malignant neoplasm of lymphoid, haematopoietic tissue     | 1483             | -3.5                       | 1729   | -3.6                       | 2075      | 3.9                        | 2860   | 22.2                       | 2074        | -0.1                       | 2386   | 0.3                        | 2742               | -2.7                       | 3478   | 8.4                        |
| 8 Lung cancer                                               | 4096             | 2.2                        | 4418   | 1.2                        | 5635      | -3.7                       | 6441   | 2.0                        | 5687        | 1.1                        | 6167   | 1.7                        | 7681               | -2.2                       | 8564   | 1.6                        |
| 9 Neoplasms of reproductive organs                          | 3022             | 7.2                        | 3689   | 4.3                        | 4103      | 0.1                        | 5636   | 12.3                       | 4134        | 2.5                        | 5032   | 2.6                        | 5544               | -0.3                       | 7040   | 4.7                        |
| 10 Remaining Neoplasms                                      | 11028            | 1.7                        | 21415  | 2.8                        | 16056     | -0.4                       | 32092  | 3.8                        | 16127       | 0.4                        | 31323  | 2.3                        | 21254              | -1.5                       | 41846  | 0.8                        |
| 11 Diseases of the blood (-forming organs), immunological   | 380              | -3.7                       | 2713   | -1.6                       | 563       | 15.1                       | 4447   | 22.2                       | 448         | -0.8                       | 3525   | 4.2                        | 671                | 4.2                        | 5343   | 12.8                       |
| 12 Diabetes mellitus                                        | 1861             | -6.8                       | 6474   | -10.7                      | 3292      | 35.6                       | 14846  | 65.9                       | 2471        | 9.8                        | 8876   | 11.5                       | 3673               | 18.1                       | 13960  | 27.8                       |
| 13 Obesity                                                  | 83               | -19.0                      | 522    | -5.6                       | 139       | -1.8                       | 1283   | 86.8                       | 121         | 26.7                       | 737    | 37.5                       | 160                | 3.2                        | 1410   | 70.8                       |
| 14 Other endocrine, nutritional and metabolic diseases      | 628              | -0.9                       | 5375   | -4.0                       | 916       | 16.5                       | 9584   | 36.8                       | 788         | 8.6                        | 7647   | 18.4                       | 1158               | 17.6                       | 11166  | 28.5                       |
| 15 Dementia, Alzheimer                                      | 6980             | -8.1                       | 11657  | -7.2                       | 10280     | 10.5                       | 24293  | 56.7                       | 9627        | 6.2                        | 16479  | 11.0                       | 10906              | -8.6                       | 21920  | 11.8                       |
| 16 Other mental/behavioural disorders/nervous system        | 2111             | -4.3                       | 7347   | -12.3                      | 2910      | 7.8                        | 12870  | 21.9                       | 2874        | 14.4                       | 10037  | 0.1                        | 3491               | -0.4                       | 14062  | 3.1                        |
| 17 Hypertensive diseases                                    | 2390             | -9.2                       | 10457  | -8.8                       | 4144      | 34.3                       | 25140  | 79.7                       | 3142        | 15.1                       | 14502  | 15.8                       | 4595               | 23.2                       | 23095  | 34.1                       |
| 18 Ischaemic heart diseases                                 | 5606             | -12.3                      | 7785   | -12.4                      | 7750      | 0.8                        | 12493  | 16.2                       | 6589        | -1.1                       | 9395   | 1.4                        | 9709               | 2.7                        | 14537  | 10.0                       |
| 19 Other heart diseases                                     | 2928             | 1.1                        | 6419   | -4.4                       | 3471      | -7.1                       | 10153  | 14.3                       | 3230        | 2.2                        | 8009   | 5.5                        | 4728               | 5.5                        | 12304  | 15.1                       |
| 20 Cerebrovascular diseases                                 | 4739             | -6.3                       | 7384   | -9.6                       | 6693      | 0.5                        | 12376  | 17.1                       | 5943        | 0.4                        | 9635   | 1.1                        | 8442               | 0.2                        | 14264  | 7.4                        |
| 21 Other diseases of the circulatory system                 | 6909             | -8.4                       | 20643  | -7.2                       | 9354      | 0.5                        | 33216  | 21.0                       | 8018        | 1.1                        | 23955  | 3.9                        | 11359              | 3.2                        | 36863  | 14.1                       |
| 22 Chronic liver diseases                                   | 775              | 0.0                        | 1227   | -1.6                       | 872       | -12.6                      | 1614   | -1.0                       | 916         | -0.5                       | 1495   | -0.7                       | 1413               | 7.2                        | 2413   | 11.6                       |
| 23 Other diseases of the digestive system                   | 3316             | 1.8                        | 8520   | 1.5                        | 4094      | -8.3                       | 11682  | 0.7                        | 4206        | 1.6                        | 11030  | 0.4                        | 5973               | -0.3                       | 15741  | 1.7                        |
| 24 Diseases of the skin and subcutaneous tissue             | 315              | 0.3                        | 1563   | 4.5                        | 489       | 8.7                        | 2467   | 15.6                       | 521         | 9.8                        | 2461   | 19.0                       | 577                | 2.7                        | 2924   | 8.9                        |
| 25 Diseases of the musculoskeletal system/connective tissue | 997              | -1.5                       | 2467   | -2.3                       | 1254      | -4.7                       | 4113   | 25.3                       | 1292        | 7.1                        | 3331   | 9.0                        | 1682               | 2.1                        | 4857   | 16.6                       |
| 26 Diseases of the genitourinary system                     | 2740             | 1.3                        | 13938  | -2.5                       | 4035      | 14.8                       | 23947  | 29.5                       | 4059        | 21.5                       | 19049  | 12.2                       | 4976               | 11.3                       | 27807  | 20.6                       |
| 27 Other diseases                                           | 283              | 2.0                        | 594    | 6.1                        | 368       | -0.1                       | 1049   | 42.3                       | 337         | -6.9                       | 815    | 16.8                       | 445                | -10.4                      | 1222   | 23.1                       |
| 28 Ill-defined causes                                       | 2084             | -8.4                       | 78773  | -6.8                       | 3197      | 11.8                       | 157625 | 50.5                       | 2493        | -8.9                       | 101485 | 6.8                        | 3333               | -18.0                      | 159109 | 20.8                       |
| 29 Transport accidents                                      | 319              | -4.8                       | 322    | -4.2                       | 252       | -46.4                      | 259    | -45.3                      | 507         | -10.6                      | 513    | -10.0                      | 608                | -13.8                      | 625    | -11.9                      |
| 30 Accidental falls                                         | 640              | 14.7                       | 723    | 12.7                       | 779       | 2.0                        | 924    | 9.0                        | 905         | 9.2                        | 1057   | 16.3                       | 1281               | 19.8                       | 1507   | 25.9                       |
| 31 Other accidental threats to breathing                    | 533              | 3.2                        | 3064   | -3.7                       | 574       | -12.5                      | 4030   | -4.3                       | 664         | -2.3                       | 4470   | 8.7                        | 740                | -12.8                      | 5551   | 4.1                        |
| 32 Suicide and self-inflicted injury                        | 664              | 19.0                       | 665    | 19.0                       | 902       | -6.1                       | 906    | -5.8                       | 1155        | 21.4                       | 1159   | 21.6                       | 1220               | 7.5                        | 1225   | 8.0                        |
| 33 Other external causes                                    | 765              | 2.7                        | 5434   | 12.6                       | 972       | -6.0                       | 7250   | 9.0                        | 1252        | 8.5                        | 7945   | 20.8                       | 1346               | -5.0                       | 9939   | 12.5                       |

For the data source, see main text.

**Supplementary Table S4 Contribution of COVID-19 only as underlying cause of death to all-cause life expectancy and lifespan inequality at age 30 by sex. Spain. 2020.**

|       |                           | Educational groups |       |        |       | Inequality gap | Changes in inequality by eliminating COVID-19 (%) |
|-------|---------------------------|--------------------|-------|--------|-------|----------------|---------------------------------------------------|
|       |                           | All                | Low   | Medium | High  |                |                                                   |
| Men   | e30                       | 49.99              | 48.46 | 49.91  | 52.20 | 3.74           |                                                   |
|       | e30 eliminating COVID-19  | 51.48              | 50.12 | 51.46  | 53.90 | 3.78           |                                                   |
|       | PGLE COVID-19             | 1.49               | 1.66  | 1.54   | 1.70  | 0.03           | 0.9%                                              |
|       | SD30                      | 12.06              | 13.18 | 12.27  | 10.94 | -2.24          |                                                   |
|       | SD30 eliminating COVID-19 | 12.41              | 13.38 | 12.68  | 11.30 | -2.07          |                                                   |
| Women | e30                       | 55.31              | 54.00 | 55.76  | 56.70 | 2.71           |                                                   |
|       | e30 eliminating COVID-19  | 56.52              | 55.46 | 57.07  | 58.07 | 2.61           |                                                   |
|       | PGLE COVID-19             | 1.21               | 1.46  | 1.31   | 1.36  | -0.09          | -3.5%                                             |
|       | SD30                      | 10.83              | 12.30 | 10.99  | 10.31 | -1.99          |                                                   |
|       | SD30 eliminating COVID-19 | 11.00              | 12.22 | 11.21  | 10.65 | -1.57          |                                                   |
|       | Difference                | 0.17               | -0.08 | 0.22   | 0.34  | 0.42           | -21.1%                                            |

For the data source and methodology, see main text.

### Supplementary references <sup>1</sup>, <sup>2</sup> and <sup>3</sup>

1. INE. Certificado médico de defunción (Medical death certificate). Madrid: INE (Instituto Nacional de Estadística); 2009. [https://www.ine.es/metodologia/t20/cues\\_def\\_09.pdf](https://www.ine.es/metodologia/t20/cues_def_09.pdf). Accessed 17/1/2023.
2. INE. Death statistics according to cause of death. Methodology. Madrid: INE (Instituto Nacional de Estadística); 2020. [https://www.ine.es/en/daco/daco42/sanitarias/metodologia\\_00\\_en.pdf](https://www.ine.es/en/daco/daco42/sanitarias/metodologia_00_en.pdf). Accessed 26/7/2022.
3. INE. Asignación de nivel educativo, relación con la actividad laboral y ocupación a ficheros de Movimiento Natural de la Población (MNP). Método de obtención y advertencias a usuarios (Assignment of educational level, relation to employment activity and occupation to the Vital Statistics (MNP) files. Method of capturing and warnings to users.). Madrid, Spain: INE (Spanish National Statistics Institute); 2020. [https://www.ine.es/metodologia/t20/Nota\\_meto\\_MNP.pdf](https://www.ine.es/metodologia/t20/Nota_meto_MNP.pdf). Accessed 16/7/2022.
